# Supplementary material for: Arabidopsis thaliana alpha1,2-glucosyltransferase (ALG10) is required for efficient N-glycosylation and leaf growth
Source: PubMed Central journal article supplement (PMC3204403; doi:10.1111/j.1365-313x.2011.04688.x), 2011-07-27
Supplement: tpj0068-0314-SD1.pdf [file tpj0068-0314-SD1.pdf]

```

*****
ALG10 -----MGKLAVAAITSLWVLPMSIIVNHI VPEPYMDEI FHVPOA 39
ScALG10 MDAKNTGEANNDVLEEEAAIQLIAPGIARNLTQEVITGIFCNVVIYPLLLIYFVLTFRYMTNIIVVEYFIDEKFKHVGOT 80
HsALG10 -----MAQLEGYYFSAALSCITFLVSCLLFSAFSRAIREPYMDEIFHLPOA 45

***** X *****
ALG10 QQYCNNGNFRS--WDPMITTPPGLYYLSLAHVASLFPGLMLLMENTSQSFSEACSTSVLRSTNAVSAVLCGVLVYEIIRFLG 117
ScALG10 LTYLKCKWTQ--WDPKITTPPGIYILGLINYYCIKP-----IEKSWSTLTILRLVNLLGGIIVFPIILVLRPIFLF 148
HsALG10 QRYCEGHFSLSQWDPMITTLPGLYLVSIG---VTKPATWIFG---WSEHVVCSTIGVLRFEVNLIFSNGEYLLLYLLFCKVQ 119

X ***** X *****
ALG10 EN---LSDRKATFMALVMSLYPLHWFFTFLYYTDVASLITAVLAMVITCLKR-----RYVLSALFCTLAVFIRQTNVVM 188
ScALG10 N-----ALGFWPVSLSMSPMLMTYYLYFYTDVWSTILILQSLSCVLTLPFGPVKSIWLSAFAGVSCVLFQRTNI IWT 220
HsALG10 PRNKAASSIQRVLSTLTLAVFPTLYFFNFELYTEAGSMFFTLFAVLMCLYG-----NHKTSALFCGCFMFRQTNIIWA 193

*****
ALG10 LFVACSGILDFTDSSKQKQKQEVNQELHQSSNKKGATLRNLRKRKSDISSDTSDFPNHGQTVPSTEDTSDLVYDIYTV 268
ScALG10 GFTMILAVERPALLQKQFN-----THTFNNT 246
HsALG10 VFCAGNVIQAQKLTEAWKTELQ-----KKEDRLPPIKCPFAEFR-----KILQELLA 239

*****
ALG10 IISTSNLKWRIILKFSPIFVVAFGIFILWNGGIVLGAKEAHVVSLEHAQIMYFSLVSAIFAPLHFSVNLRHQFHQL 348
ScALG10 LKLFIIHAIDDFSNLVLPMKNFVLFYIYLIWNRSTILGDKSSHSAGLHIVQIFVCFITVFSLPWISRNFMKLYKLR 326
HsALG10 YSMSEKNI SMLLLLTWPYIILGFIFCAFVVVNGGIVIGDRSSHEACLHFPQLFYFFSFTLFFSFPHLSPSKIKTLSLV 319

X ***** X *****
ALG10 HRNWSLSLILTLVALVAGFVSHEFFSLAHPYLLADNRHYPFYLWRKIIN--AHWLMKYILVPVYVYSWFSILTLLAK--- 423
ScALG10 KRKPVQTFEEFTGIMLIIR---YFTKVHPPELLADNRHYTFYLFRRLLGNKSRLIKYFEMTPIYHFSTFAYLEVMPNQL 402
HsALG10 WKRRILFFVVTLVSVFL---VWKFITYAHKYLADNRHYTFYVWKRVFQ--RYETVKYLLVPAVIFAGWSIADSLK---- 389

*****
ALG10 -----TRRQTWILVYFLATCGVIVPTPLIEFRYYTIPFYLFMLHS-----CVR 466
ScALG10 TFHPITPLPIKEPVHLPIQLTHVSWTALITCTMVTIVPSPLFEPYRYILPYFFWRIFITCSCEPLIKDLKPAKEGENPIT 482
HsALG10 -----SKSIFWNL MFFICLFTVIVPQKLEFRYFIFLPYVIYRLNI-----PIIP 432

*****
ALG10 SSSFATWLLIGTIFVSNVFTVAMFLFRPFKWSHEDGVQRFIW 509
ScALG10 ISSTKRLFMFLWFMLENVVTLVIFSKVSPWTEPYLQRIIW 525
HsALG10 PISRLICELS--CYAVVNFTIFFIFLNKTFQWPN SQDIQRFMW 473

```

Figure S1
