# Supplementary material for: Arabidopsis thaliana alpha1,2-glucosyltransferase (ALG10) is required for efficient N-glycosylation and leaf growth
Source: PubMed Central journal article supplement (PMC3204403; doi:10.1111/j.1365-313x.2011.04688.x), 2011-07-27
Supplement: tpj0068-0314-SD2.pdf [file tpj0068-0314-SD2.pdf]

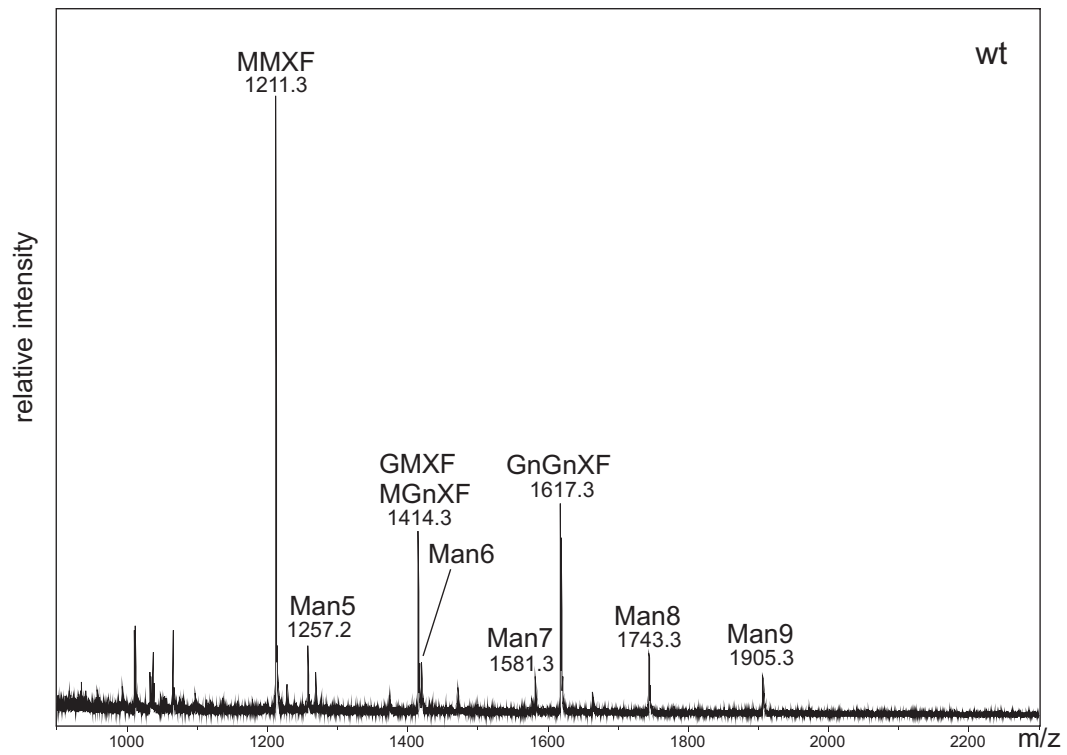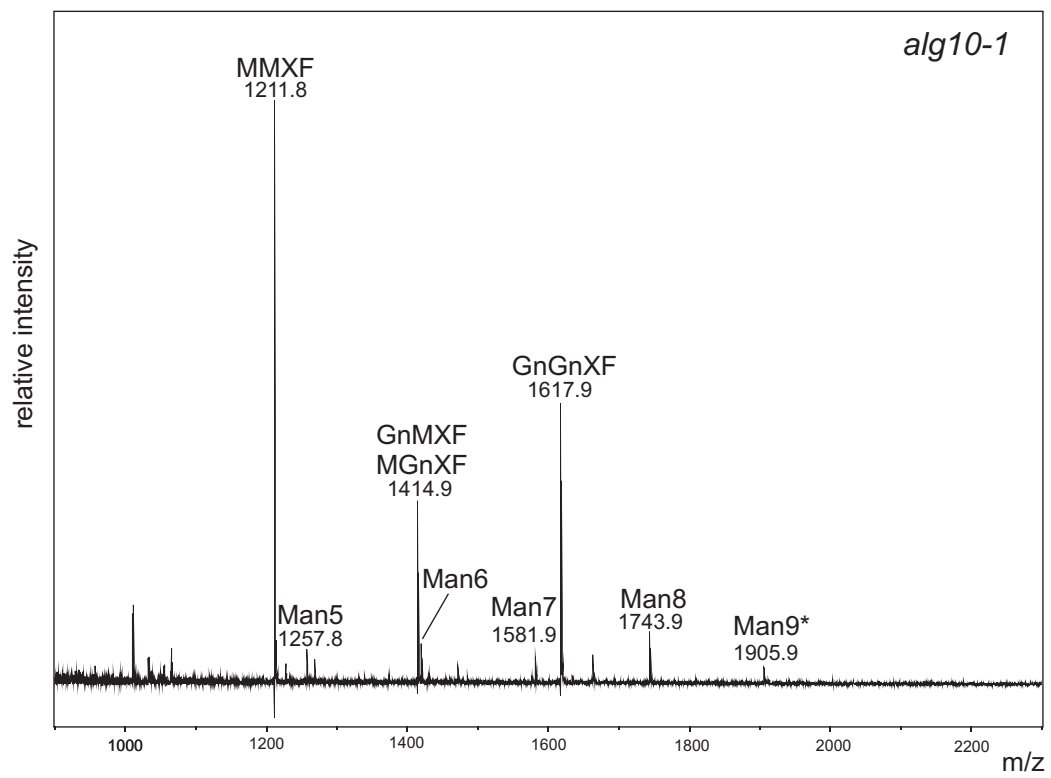

Figure S2
