# Supplementary material for: Arabidopsis thaliana alpha1,2-glucosyltransferase (ALG10) is required for efficient N-glycosylation and leaf growth
Source: PubMed Central journal article supplement (PMC3204403; doi:10.1111/j.1365-313x.2011.04688.x), 2011-07-27
Supplement: tpj0068-0314-SD12.pdf [file tpj0068-0314-SD12.pdf]

**Table S1**

| <b>Name</b> | <b>Sequences (5' - 3')</b>                   |
|-------------|----------------------------------------------|
| ALG10_1F    | CAGTGCATTGGTAAGTGATTTGAAG                    |
| ALG10_2R    | CTGAGAAGTGTAGGGGAGCAGTGA                     |
| ALG10_4F    | GGATCCGATTGGTTCCTTTTGTG                      |
| ALG10_5R    | GAGGAACCAAACAATAGCATCAAAA                    |
| ALG10_6F    | <u>TGCTAGCAT</u> GGGGAAATTAGCCGTTGCAGCGA     |
| ALG10_7R    | <u>TAGATCT</u> CCATATAAACCTCTGGACACCATCTTC   |
| ALG10_8F    | GCTCTTTTCACTGCTCCCCTACAC                     |
| ALG10_9R    | AGGGTAAAGCGACATGACTAACG                      |
| ALG10_10F   | <u>TAGATCT</u> ATGGGGAAATTAGCCGTTGCAGCGA     |
| ALG10_11R   | <u>TGTCGAC</u> CTACCATATAAACCTCTGGACACCAT    |
| ALG10_12F   | CGTTAGTCATGTCGCTTTACCCTCTC                   |
| ALG10_24F   | TATA <u>ACTAGT</u> ATGGGGAAATTAGCCGTTGCAGCGA |
| ALG10_25R   | TATA <u>AGATCT</u> CTACCATATAAACCTCTGGACACCA |
| ALG3_9F     | TGGTTTTGATTTGTCTGTTTATGATGG                  |
| ALG3_8R     | CAAAGCAGACACCACTCCAATGAT                     |
| ScALG10_1F  | TACACCGAGCCCAGTCACATC                        |
| ScALG10_2R  | TGAAACGGGCCAAAAACCTAAG                       |
| ScALG10_4R  | AAACGGTTGGCCACTAAAAGATG                      |
| Kan-B       | CTGCAGCGAGGAGCCGTAAT                         |
| Kan-C       | TGATTTTGTGACGAGCGTAAT                        |
| Kan-D       | CCCCGGCAAACAGCATTCC                          |
| RBsail1     | CACACAGGAAACAGCTATGAC                        |
| LBsail1     | TAGCATCTGAATTTCATAACCAATCTCGATACAC           |
| LBa1        | TGGTTCACGTAGTGGGCCATCG                       |
| pTK2-fw     | TTCTGCACAATATTTCAAGCTATACC                   |
| UBQ5-D      | AACCCTTGAGGTTGAATCATC                        |
| UBQ5-U      | CTCCTTCTTTCTGGTAAACGT                        |
